# Supplementary material for: Screening accuracy of a 14-day smartphone ambulatory assessment of depression symptoms and mood dynamics in a general population sample: Comparison with the PHQ-9 depression screening
Source: PubMed Central journal article supplement (PMC7787464; doi:10.1371/journal.pone.0244955), 2021-01-06
Supplement: pone.0244955.s001.pdf [file pone.0244955.s001.pdf]

**S1 Fig. Individual mood trajectories over the 14-day assessment period (N = 113).**

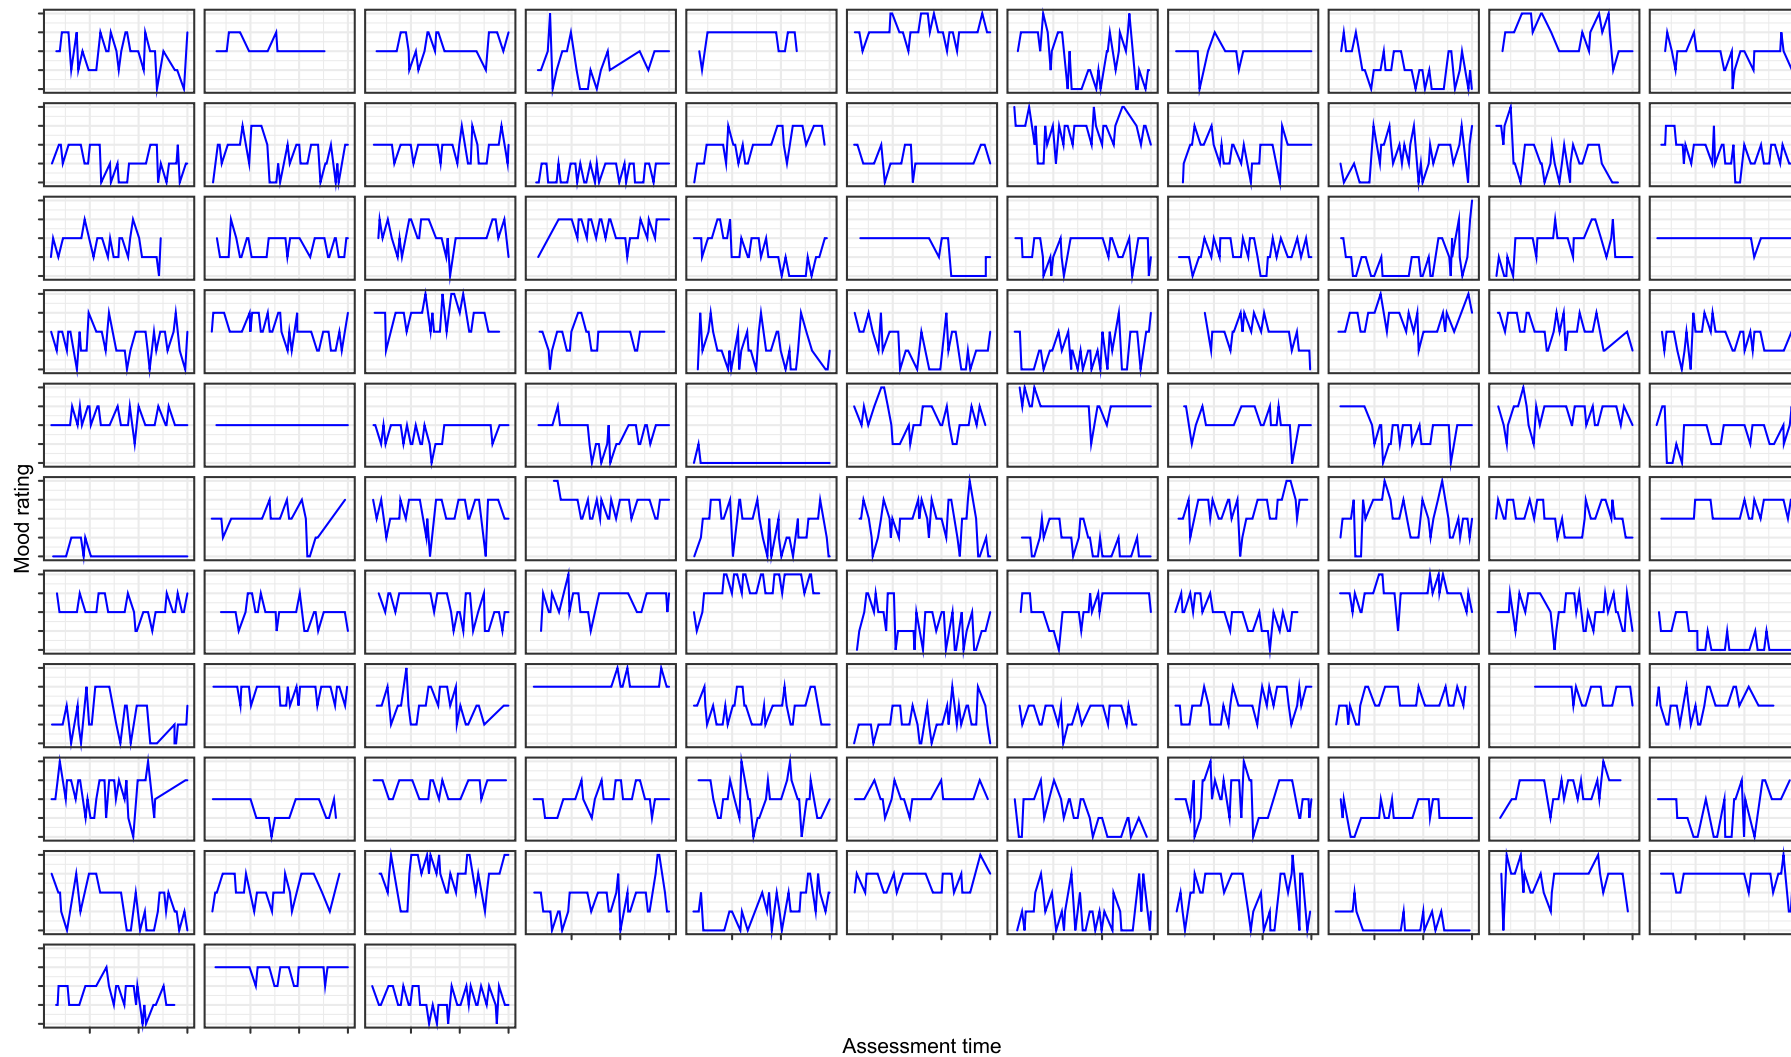

Assessment time = Exact time point of assessment; Mood rating = Momentary assessed mood score between 0 (negative mood) and 5 (positive mood)
