# Supplementary material for: Screening accuracy of a 14-day smartphone ambulatory assessment of depression symptoms and mood dynamics in a general population sample: Comparison with the PHQ-9 depression screening
Source: PubMed Central journal article supplement (PMC7787464; doi:10.1371/journal.pone.0244955), 2021-01-06
Supplement: pone.0244955.s002.pdf [file pone.0244955.s002.pdf]

**S2 Fig. Mood RMSSD for levels of depression severity (N = 113).**

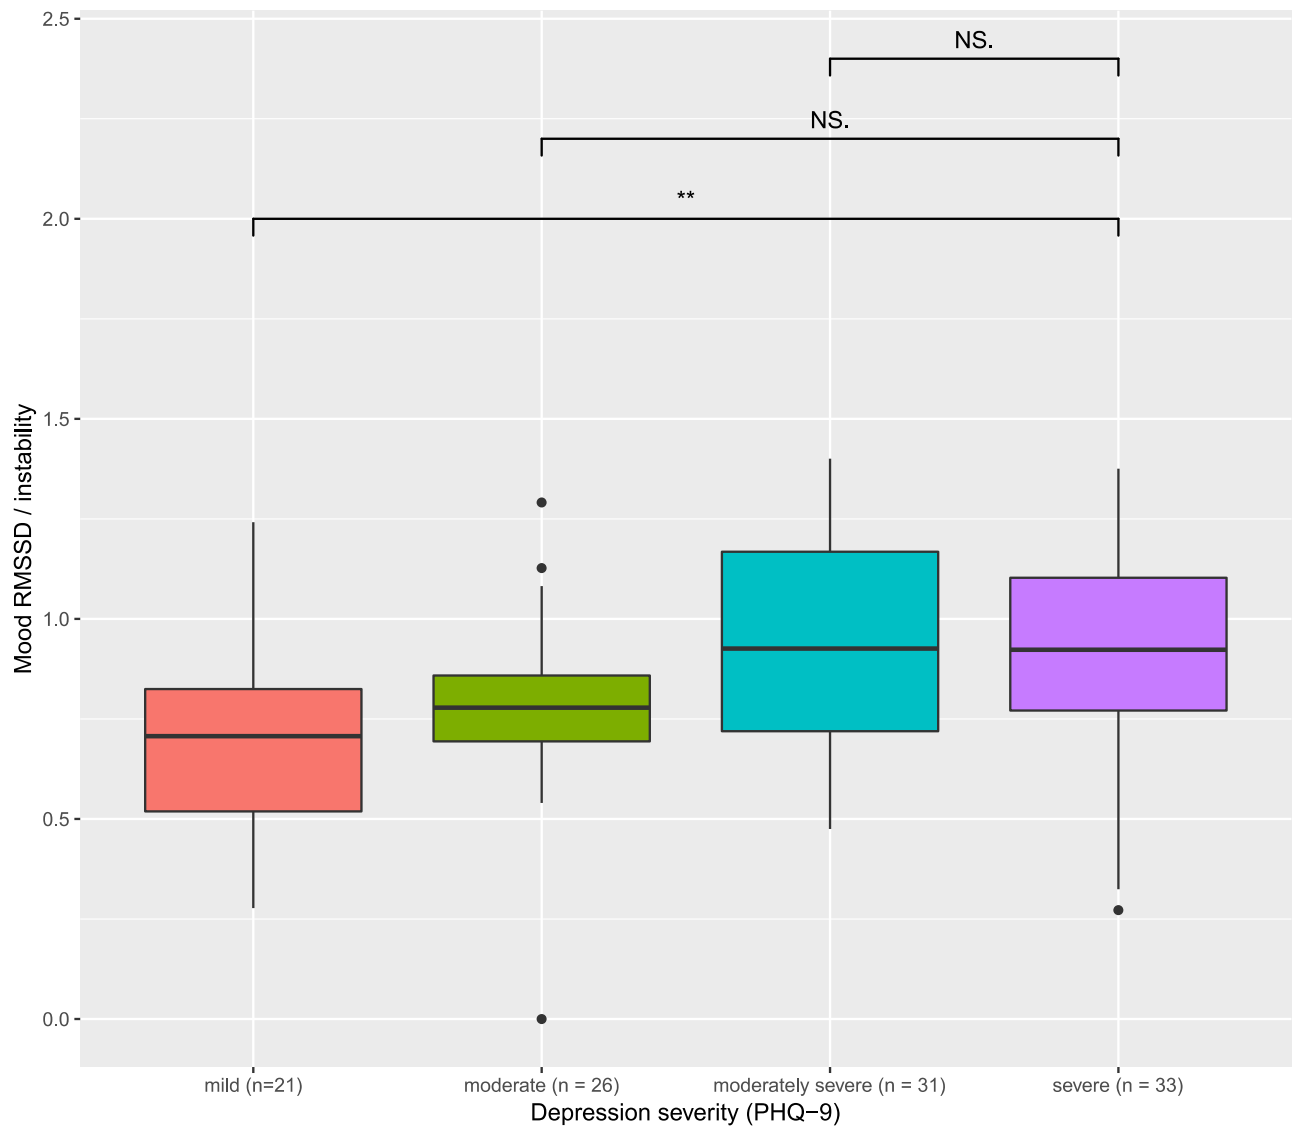

NS  $p \geq .05$ , \*\*  $p < .01$ .
